# Supplementary material for: Translational study identifies XPF and MUS81 as predictive biomarkers for oxaliplatin-based peri-operative chemotherapy in patients with esophageal adenocarcinoma
Source: PubMed Central journal article supplement (PMC5940885; doi:10.1038/s41598-018-24232-2), 2018-05-08
Supplement: 41598_2018_24232_MOESM1_ESM.pdf [file 41598_2018_24232_MOESM1_ESM.pdf]

# **Translational study identifies XPF and MUS81 as predictive biomarkers for oxaliplatin-based peri-operative chemotherapy in patients with esophageal adenocarcinoma**

T. P. MacGregor<sup>1</sup>, R. Carter<sup>1</sup>, R. S. Gillies<sup>1,2</sup>, J. M. Findlay<sup>2,3</sup>, C. Kartsonaki<sup>1,4,5</sup>, F. Castro-Giner<sup>3</sup>, N. Sahgal<sup>6</sup>, L. M. Wang<sup>7,8</sup>, R. Chetty<sup>9</sup>, N. D. Maynard<sup>2</sup>, J. B. Cazier<sup>1,10</sup>, F. Buffa<sup>1</sup>, P. J. McHugh<sup>11</sup>, I. Tomlinson<sup>3</sup>, M. R. Middleton<sup>1\*</sup>, R. A. Sharma<sup>1,12\*</sup>

*1 NIHR Oxford Biomedical Research Centre, Department of Oncology, University of Oxford, Oxford, UK*

*2 Department of Upper GI Surgery, Churchill Hospital, Oxford, UK*

*3 Wellcome Trust Centre for Human Genetics, University of Oxford, UK*

*4 Nuffield Department of Population Health, University of Oxford, Oxford, UK*

*5 Medical Research Council Population Health Research Unit (MRC PHRU) at the University of Oxford, Oxford, UK*

*6 Ludwig Institute for Cancer Research, University of Oxford, Nuffield Department of Medicine, Oxford, UK*

*7 NIHR Oxford Biomedical Research Centre/Department of Cellular Pathology/Radcliffe Department of Medicine, Oxford University Hospitals and University of Oxford, UK*

*8 Department of Laboratory Medicine, Changi General Hospital, Singapore*

*9 Laboratory Medicine Programme, University Health Network, Toronto, Canada*

*10 Centre for Computational Biology, Institute of Cancer and Genomic Sciences, College of Medical and Dental Sciences, University of Birmingham, UK*

*11 Department of Oncology, Weatherall Institute of Molecular Medicine, University of Oxford, UK*

*12 NIHR University College London Hospitals Biomedical Research Centre, UCL Cancer Institute, University College London, UK*

\* Equal contribution

Corresponding author: Professor Ricky Sharma, NIHR University College London Hospitals Biomedical Research Centre, UCL Cancer Institute, University College London, UK

Email: [ricky.sharma@oncology.ox.ac.uk](mailto:ricky.sharma@oncology.ox.ac.uk)

# Supplementary Figures and Tables

## Supplementary Table S1

| Gene     | Entrez I.D. | Gene    | Entrez I.D. | Gene    | Entrez I.D. | Gene    | Entrez I.D. | Gene    | Entrez I.D. | Gene     | Entrez I.D. | Gene     | Entrez I.D. |          |       |
|----------|-------------|---------|-------------|---------|-------------|---------|-------------|---------|-------------|----------|-------------|----------|-------------|----------|-------|
| ABL1     | 25          | CETN2   | 1069        | EYA1    | 2138        | INTS3   | 65123       | NSMCE2  | 286053      | PRMT6    | 55170       | RPA1     | 6117        | TOP2A    | 7153  |
| ALKBH1   | 8846        | CHAF1A  | 10036       | EYA2    | 2139        | JMY     | 133746      | NTHL1   | 4913        | PRPF19   | 27339       | RPA2     | 6118        | TOPBP1   | 11073 |
| ALKBH2   | 121642      | CHAF1B  | 8208        | EYA3    | 2140        | KAT5    | 10524       | NUDT1   | 4521        | PTTG1    | 9232        | RPA3     | 6119        | TP53     | 7157  |
| ALKBH3   | 221120      | CHD1L   | 9557        | EYA4    | 2070        | KIN     | 22944       | OBFC2A  | 64859       | RAD1     | 5810        | RPA4     | 29935       | TP53BP1  | 7158  |
| APEX1    | 328         | CHEK1   | 1111        | FANCA   | 2175        | LIG1    | 3978        | OBFC2B  | 79035       | RAD17    | 5884        | RPAIN    | 84268       | TREX2    | 11219 |
| APEX2    | 27301       | CIB1    | 10519       | FANCB   | 2187        | LIG3    | 3980        | OGG1    | 4968        | RAD18    | 56852       | RPS27L   | 51065       | TRIP13   | 9319  |
| APITD1   | 378708      | CINP    | 51550       | FANCD2  | 2177        | LIG4    | 3981        | PARG    | 8505        | RAD21    | 5885        | RPS3     | 6188        | TTC5     | 91875 |
| APTX     | 54840       | CLSPN   | 63967       | FANCE   | 2178        | MBD4    | 8930        | PARP1   | 142         | RAD23A   | 5886        | RRM2B    | 50484       | TYMS     | 7298  |
| ASF1A    | 25842       | CRY1    | 1407        | FANCF   | 2188        | MC1R    | 4157        | PARP2   | 10038       | RAD23B   | 5887        | RTEL1    | 51750       | UBE2A    | 7319  |
| ASTE1    | 28990       | CRY2    | 1408        | FANCG   | 2189        | MDC1    | 9656        | PARP3   | 10039       | RAD50    | 10111       | RUVBL2   | 10856       | UBE2B    | 7320  |
| ATM      | 472         | CSNK1D  | 1453        | FANCI   | 55215       | MEN1    | 4221        | PARP4   | 143         | RAD51    | 5888        | SETMAR   | 6419        | UBE2D3   | 7323  |
| ATR      | 545         | CSNK1E  | 1454        | FANCL   | 55120       | MGMT    | 4255        | PCNA    | 5111        | RAD51AP1 | 10635       | SETX     | 23064       | UBE2N    | 7334  |
| ATRIP    | 84126       | CUL4A   | 8451        | FANCM   | 57697       | MLH1    | 4292        | PIPSL   | 266971      | RAD51C   | 5889        | SFPQ     | 6421        | UBE2V1   | 7335  |
| ATRX     | 546         | CUL4B   | 8450        | FBXO18  | 84893       | MLH3    | 27030       | PMS1    | 5378        | RAD51L1  | 5890        | SHPRH    | 257218      | UBE2V2   | 7336  |
| ATXN3    | 4287        | DCLRE1A | 9937        | FBXO6   | 26270       | MNAT1   | 4331        | PMS2    | 5395        | RAD51L3  | 5892        | SIRT1    | 23411       | UHRF1    | 29128 |
| AXIN2    | 8313        | DCLRE1B | 64858       | FEN1    | 2237        | MORF4L1 | 10933       | PMS2CL  | 441194      | RAD54B   | 25788       | SLC30A9  | 10463       | UIMC1    | 51720 |
| BARD1    | 580         | DCLRE1C | 64421       | F5BP    | 10646       | MORF4L2 | 9643        | PMS2L1  | 5379        | RAD54L   | 8438        | SLK      | 9748        | UNG      | 7374  |
| BAZ1B    | 9031        | DDDB1   | 1642        | FTO     | 79068       | MPG     | 4350        | PMS2L11 | 441263      | RAD9A    | 5883        | SLX1B    | 79008       | UPF1     | 5976  |
| BCCIP    | 56647       | DDDB2   | 1643        | FZR1    | 51343       | MRE11A  | 4361        | PMS2L2  | 5380        | RBBP8    | 5932        | SMC1A    | 8243        | USP1     | 7398  |
| BLM      | 641         | DNA2    | 1763        | GADD45A | 1647        | MSH2    | 4436        | PMS2L5  | 5383        | RBM14    | 10432       | SMC3     | 9126        | USP10    | 9100  |
| BRCA1    | 672         | DTL     | 51514       | GADD45G | 10912       | MSH3    | 4437        | PNKP    | 11284       | RBX1     | 9978        | SMC6     | 79677       | USP3     | 9960  |
| BRCA2    | 675         | EEDP1   | 80820       | GEN1    | 348654      | MSH5    | 4439        | POLA1   | 5422        | RD1M1    | 201299      | SMG1     | 23049       | UVRAG    | 7405  |
| BRCC3    | 79184       | EME1    | 146956      | GIYD1   | 548593      | MSH6    | 2956        | POLB    | 5423        | RECQL    | 5965        | SMUG1    | 23583       | VCP      | 7415  |
| BRE      | 9577        | EME2    | 197342      | GTFF2H1 | 2965        | MTMR15  | 22909       | POLD1   | 5424        | RECQL4   | 9401        | SOD1     | 6647        | WDR33    | 55339 |
| BRIP1    | 83990       | EPC2    | 26122       | GTFF2H2 | 2966        | MUM1    | 84939       | POLD3   | 10714       | RECQL5   | 9400        | SRBD1    | 55133       | WRN      | 7486  |
| BTBD12   | 84464       | ERCC1   | 2067        | GTFF2H3 | 2967        | MUS81   | 80198       | POLD4   | 57804       | REV1     | 51455       | SSRP1    | 6749        | WRNIP1   | 56897 |
| BTG2     | 7832        | ERCC2   | 2068        | GTFF2H4 | 2968        | MUTYH   | 4595        | POLE    | 5426        | REV3L    | 5980        | STRA13   | 201254      | XAB2     | 56949 |
| C1orf124 | 83932       | ERCC3   | 2071        | GTFF2H5 | 404672      | NBN     | 4683        | POLE2   | 5427        | RFC1     | 5981        | SUMO1    | 7341        | XPA      | 7507  |
| CCNH     | 902         | ERCC4   | 2072        | H2AFX   | 3014        | NCOA6   | 23054       | POLG    | 5428        | RFC2     | 5982        | SUPT16H  | 11198       | XPC      | 7508  |
| CCNO     | 10309       | ERCC5   | 2073        | HELQ    | 113510      | NEIL1   | 79661       | POLG2   | 11232       | RFC3     | 5983        | SUPT6H   | 6830        | XRCC1    | 7515  |
| CDC14B   | 8555        | ERCC6   | 2074        | HERC2   | 8924        | NEIL2   | 252969      | POLH    | 5429        | RFC4     | 5984        | TDG      | 6996        | XRCC2    | 7516  |
| CDK7     | 1022        | ERCC8   | 1161        | HINFP   | 25988       | NEIL3   | 55247       | POLK    | 51426       | RFC5     | 5985        | TDP1     | 55775       | XRCC3    | 7517  |
| CDKN2D   | 1032        | ESCO1   | 114799      | HMGB1   | 3146        | NHEJ1   | 79840       | POLL    | 27343       | RFWD3    | 55159       | TERF2IP  | 54386       | XRCC5    | 7520  |
| CEBPG    | 1054        | ESCO2   | 157570      | HMGB2   | 3148        | NONO    | 4841        | POLQ    | 10721       | RNF168   | 165918      | TMEM161A | 54929       | XRCC6    | 2547  |
| CEP164   | 22897       | EXO1    | 9156        | IGHMBP2 | 3508        | NSMCE1  | 197370      | PRKDC   | 5591        | RNF8     | 9025        | TNP1     | 7141        | XRCC6BP1 | 91419 |

**Table S1.** List of DNA repair genes studied in microarray analysis  
Note that XPF protein is encoded by the ERCC4 gene.

## Supplementary Figure S1

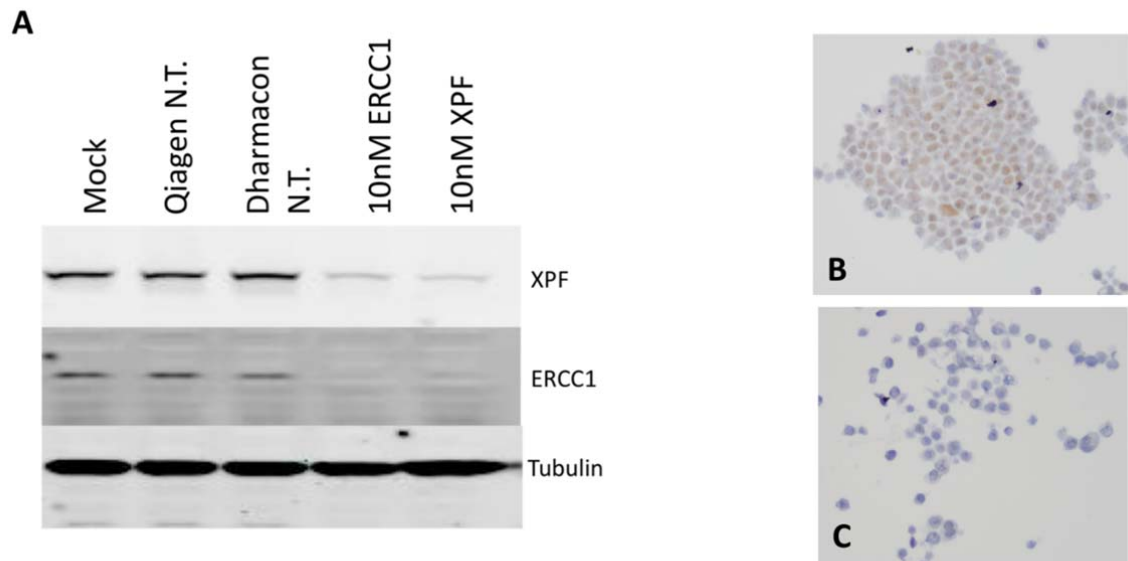

### Supplementary Figure S1. Specificity of SPM228 antibody for detection of XPF protein.

(A) Western blot showing specificity of SPM228 antibody against XPF and mutual stabilization of XPF and ERCC1 in ST16 (gastric cancer cell line) cells. siRNA knockdown of XPF markedly decreased ERCC1 detection. Likewise, ERCC1 knockdown reduced XPF protein levels. (B) Measurement of XPF as a surrogate for ERCC1 levels by IHC, with high levels detected in mock transfected cells. (C) Decreased IHC staining for XPF in ST16 cells following siRNA knockdown of XPF.

## Supplementary Figure S2

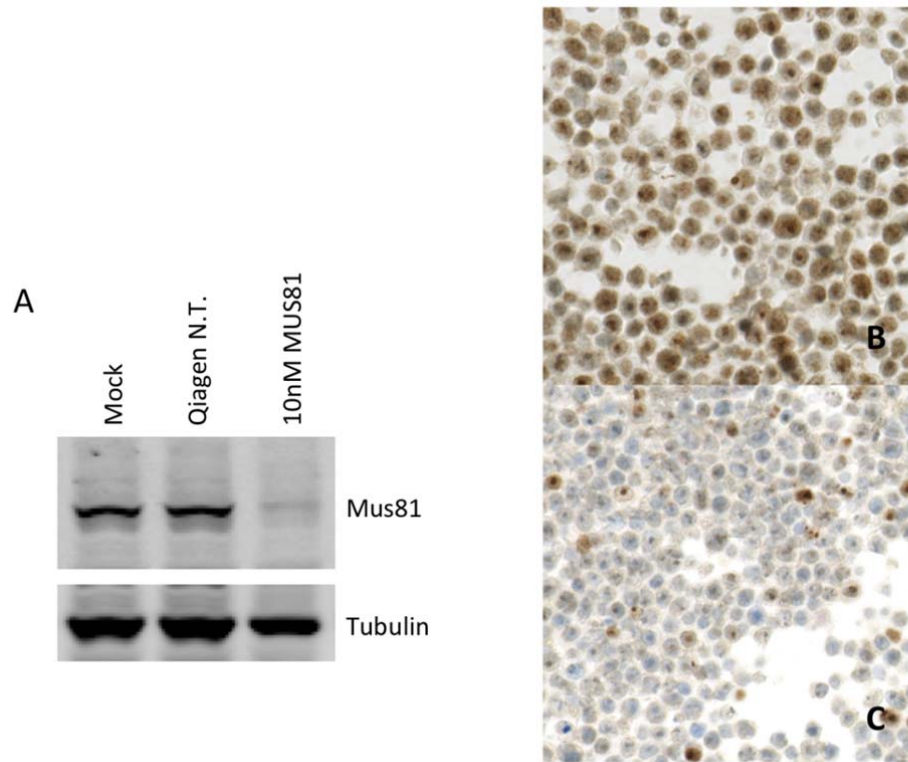

### Supplementary Figure S2. Specificity of MTA30 2G10/3 antibody for detection of MUS81 protein.

Specificity of MTA30 2G10/3 antibody against MUS81 demonstrated by (A) Western blot showing significant decrease in MUS81 following siRNA knock-down of MUS81 in ST16 cells. (B&C) The same cells fixed for IHC staining, showing: (B) strong staining in mock transfected cells, compared to (C) decreased staining for MUS81 following siRNA knockdown of MUS81.

### Supplementary Figure S3

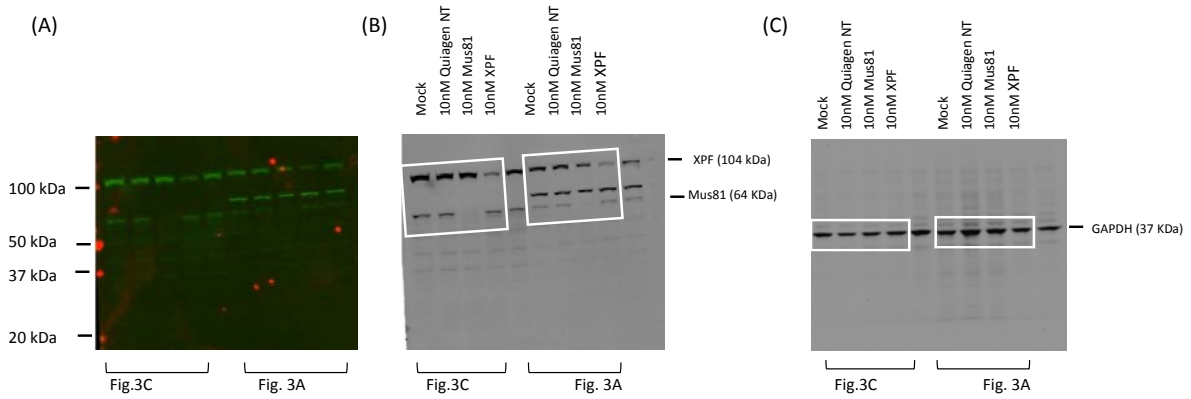

**Supplementary Figure S3. Full picture of Western blot cropped to form Figure 3 (A and C).**

(A) Full picture of blot, showing marker, probed with mouse primary antibodies to Mus81 and XPF, detected with Alexa Fluor® 680 conjugated goat mouse antibody. (B) The same blot shown greyscale, as in Figure 3A and C. (C) The same blot with rabbit primary antibody to GAPDH, detected with Alexa Fluor® 790 conjugated goat anti-rabbit antibody.

### Supplementary Figure S4

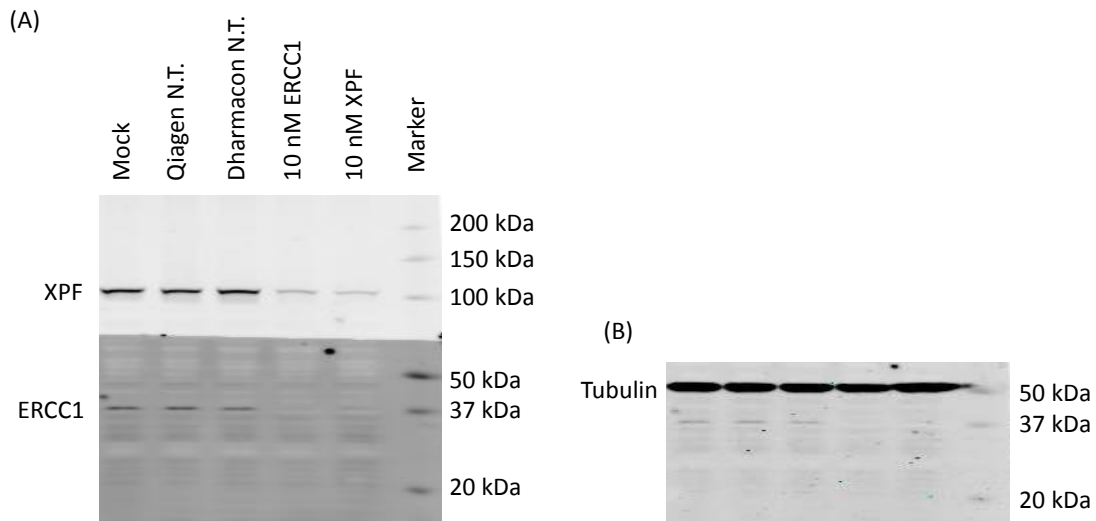

**Supplementary Figure S4. Full picture of Western blot cropped to form supplementary figure S1.**

(A) The upper section of the blot was probed with mouse primary antibodies to XPF, detected with Alexa Fluor® 680 conjugated goat mouse antibody. The lower section of the blot was probed with mouse anti-ERCC1, detected with Alexa Fluor® 680 anti-mouse antibody. (B) the lower section of the blot probed with rabbit primary antibody to tubulin, detected with Alexa Fluor® 790 anti-rabbit antibody.

## Supplementary Figure S5

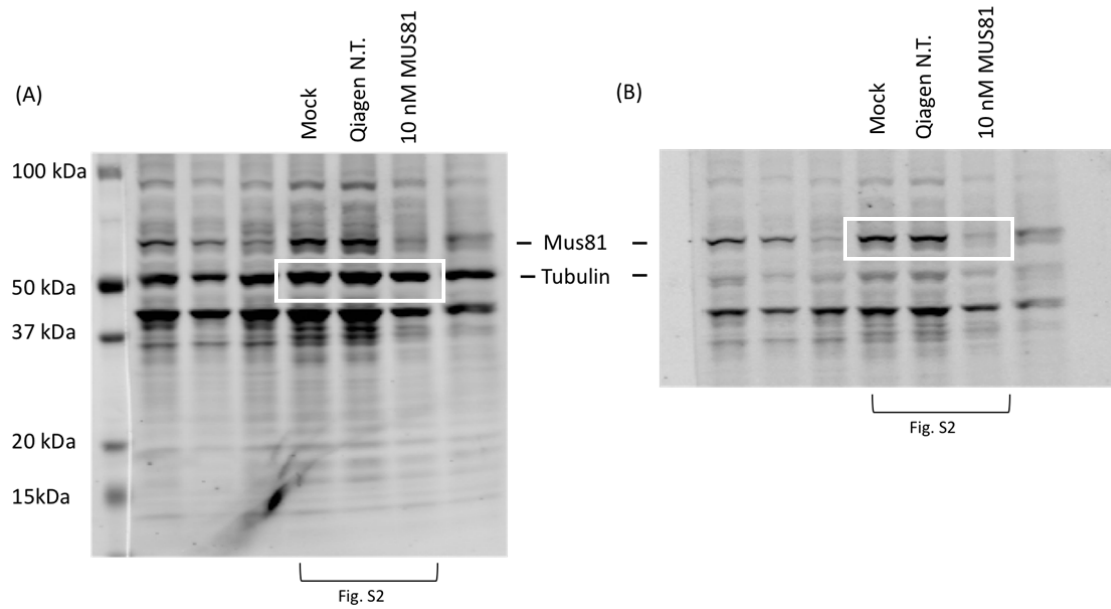

**Supplementary Figure S5. Full pictures of Western blot cropped to form supplementary figure S2A.**

The blot was probed with mouse primary antibodies to Mus81 and tubulin, detected with Alexa Fluor® 680 conjugated goat anti-mouse antibody.

(A) High exposure (with marker) used to show tubulin, (B) low exposure, used to show Mus81.
